# Supplementary material
Source: PubMed Central journal article supplement (PMC3136326)
Supplement: 1101794108_pnas.201101794SI.pdf [file 1101794108_pnas.201101794SI.pdf]

# Supporting Information

Kapoor et al. 10.1073/pnas.1101794108

## SI Materials and Methods

**Genome Sequencing and Phylogenetic Analysis.** Sequences with similarity to flaviviruses were assembled against prototype hepatitis C virus (HCV) strains. Gaps were filled by primer walking using specific and degenerate flavivirus primers. Both termini of the genome were acquired by using RACE (1). Thereafter, sequence validity was tested in 4× genome coverage by classical dideoxy Sanger sequencing. Nucleotide compositions of different flaviviruses and canine hepatitis virus (CHV) were determined by using EMBOSS compseq (<http://emboss.bioinformatics.nl/cgi-bin/emboss/compseq>). Translated amino acid sequences were aligned with ClustalW. Trees were constructed by neighbor joining of pairwise amino acid distances with the program MEGA5 (2), using bootstrap resampling to determine robustness.

**Screening and Quantitative PCR.** All respiratory and tissue samples were extracted with Qiagen viral RNA extraction kit and RNeasy tissue DNA/RNA extraction kit. RNA was converted to cDNA using random primers and then used in nested PCR with primers for the first round (Chv-0F1: 5'-TCCACCTATGGTAAGTTC-TTAGC-3' and Chcv-0R1: 5'-ACCCTGTCATAAGGGCGTC-3') and the second round (Chcv-0F2: 5'-CCTATGGTAAGTTC-TTAGCTGAC-3' and Chcv-0R2: 5'-CCTGTCATAAGGGCG-TCCGT-3'). All PCR products were sequenced to confirm the presence of CHV in samples. Quantitative PCR to determine the CHV genome copy number in respiratory samples was performed by using SYBR green chemistry and a plasmid containing HCV helicase gene as a copy number standard. The primers used were 5'-GCCATAGCACAGACTCCAC-3' (CHV-SG-F1) and 5'-GACGGAAACATCCAAACCCCG-3' (CHV-SG-2R1) with ready-to-use PCR mix (Applied Biosystems).

**Evolutionary Analysis.** Bayesian Markov chains Monte Carlo (MCMC) phylogenies and associated time to most recent com-

mon ancestor (TMRCA) for representative members of the HCV strains, CHV-01, and GHV-B were estimated by using a 555-nt segment of the NS5B gene in the program BEAST v1.6 (3). TMRCA was estimated by using a relaxed molecular clock with an uncorrelated log-normal distribution on the rate that was calibrated by using external rate estimates based on the NS5B genes of (i) the global diversity of HCV subtypes 1a and 1b (4) and (ii) HCV subtype 6 diversity in Asia (5). Normal and log-normal distributions were determined by the mean and 95% highest posterior densities (HPDs) of the reported substitution rates for all three codon positions as well as only the first and second codon positions to limit the effect of potential site saturation at the third position. A general time reversible of nucleotide substitution was used, with rate heterogeneity among sites modeled by a discrete gamma distribution with four rate categories, as determined by ModelTest (6). All analyses were performed with several tree priors, including a speciation model (Yule) and two unconstrained coalescent models, the Bayesian Skyline (7) and Bayesian Skyride (8) demographic models. MCMC sampling was performed for  $5 \times 10^7$  generations, sampling every 5,000 generations. Convergence and mixing were assessed with the program Tracer v1.5 (<http://tree.bio.ed.ac.uk>). Maximum clade credibility trees were generated with TreeAnnotator (3).

For the data sets calibrated with both HCV subtypes 1 a/b and subtype 6, the Yule speciation model had the best fit to the data, as assessed by comparing the posterior tree likelihoods (Fig. S3). Analyses that included third-codon positions resulted in wider 95% HPDs around the mean TMRCA, likely because of an increased number of substitutions at that site. However, all model-prior combinations for each of the rate calibrations resulted in 95% HPDs that were overlapping between the analyses, indicating that estimates are robust to the choice of tree prior and inclusion of third-codon positions.

1. Kapoor A, et al. (2008) A highly prevalent and genetically diversified *Picornaviridae* genus in South Asian children. *Proc Natl Acad Sci USA* 105:20482–20487.
2. Kumar S, Nei M, Dudley J, Tamura K (2008) MEGA: A biologist-centric software for evolutionary analysis of DNA and protein sequences. *Brief Bioinform* 9:299–306.
3. Drummond AJ, Rambaut A (2007) BEAST: Bayesian evolutionary analysis by sampling trees. *BMC Evol Biol* 7:214.
4. Magiorkinis G, et al. (2009) The global spread of hepatitis C virus 1a and 1b: A phylogenetic and phylogeographic analysis. *PLoS Med* 6:e1000198.
5. Pybus OG, et al. (2009) Genetic history of hepatitis C virus in East Asia. *J Virol* 83:1071–1082.
6. Posada D, Crandall KA (1998) MODELTEST: Testing the model of DNA substitution. *Bioinformatics* 14:817–818.
7. Drummond AJ, Rambaut A, Shapiro B, Pybus OG (2005) Bayesian coalescent inference of past population dynamics from molecular sequences. *Mol Biol Evol* 22:1185–1192.
8. Minin VN, Bloomquist EW, Suchard MA (2008) Smooth skyride through a rough skyline: Bayesian coalescent-based inference of population dynamics. *Mol Biol Evol* 25:1459–1471.
9. Krey T, et al. (2010) The disulfide bonds in glycoprotein E2 of hepatitis C virus reveal the tertiary organization of the molecule. *PLoS Pathog* 6:e1000762.
10. Whidby J, et al. (2009) Blocking hepatitis C virus infection with recombinant form of envelope protein 2 ectodomain. *J Virol* 83:11078–11089.

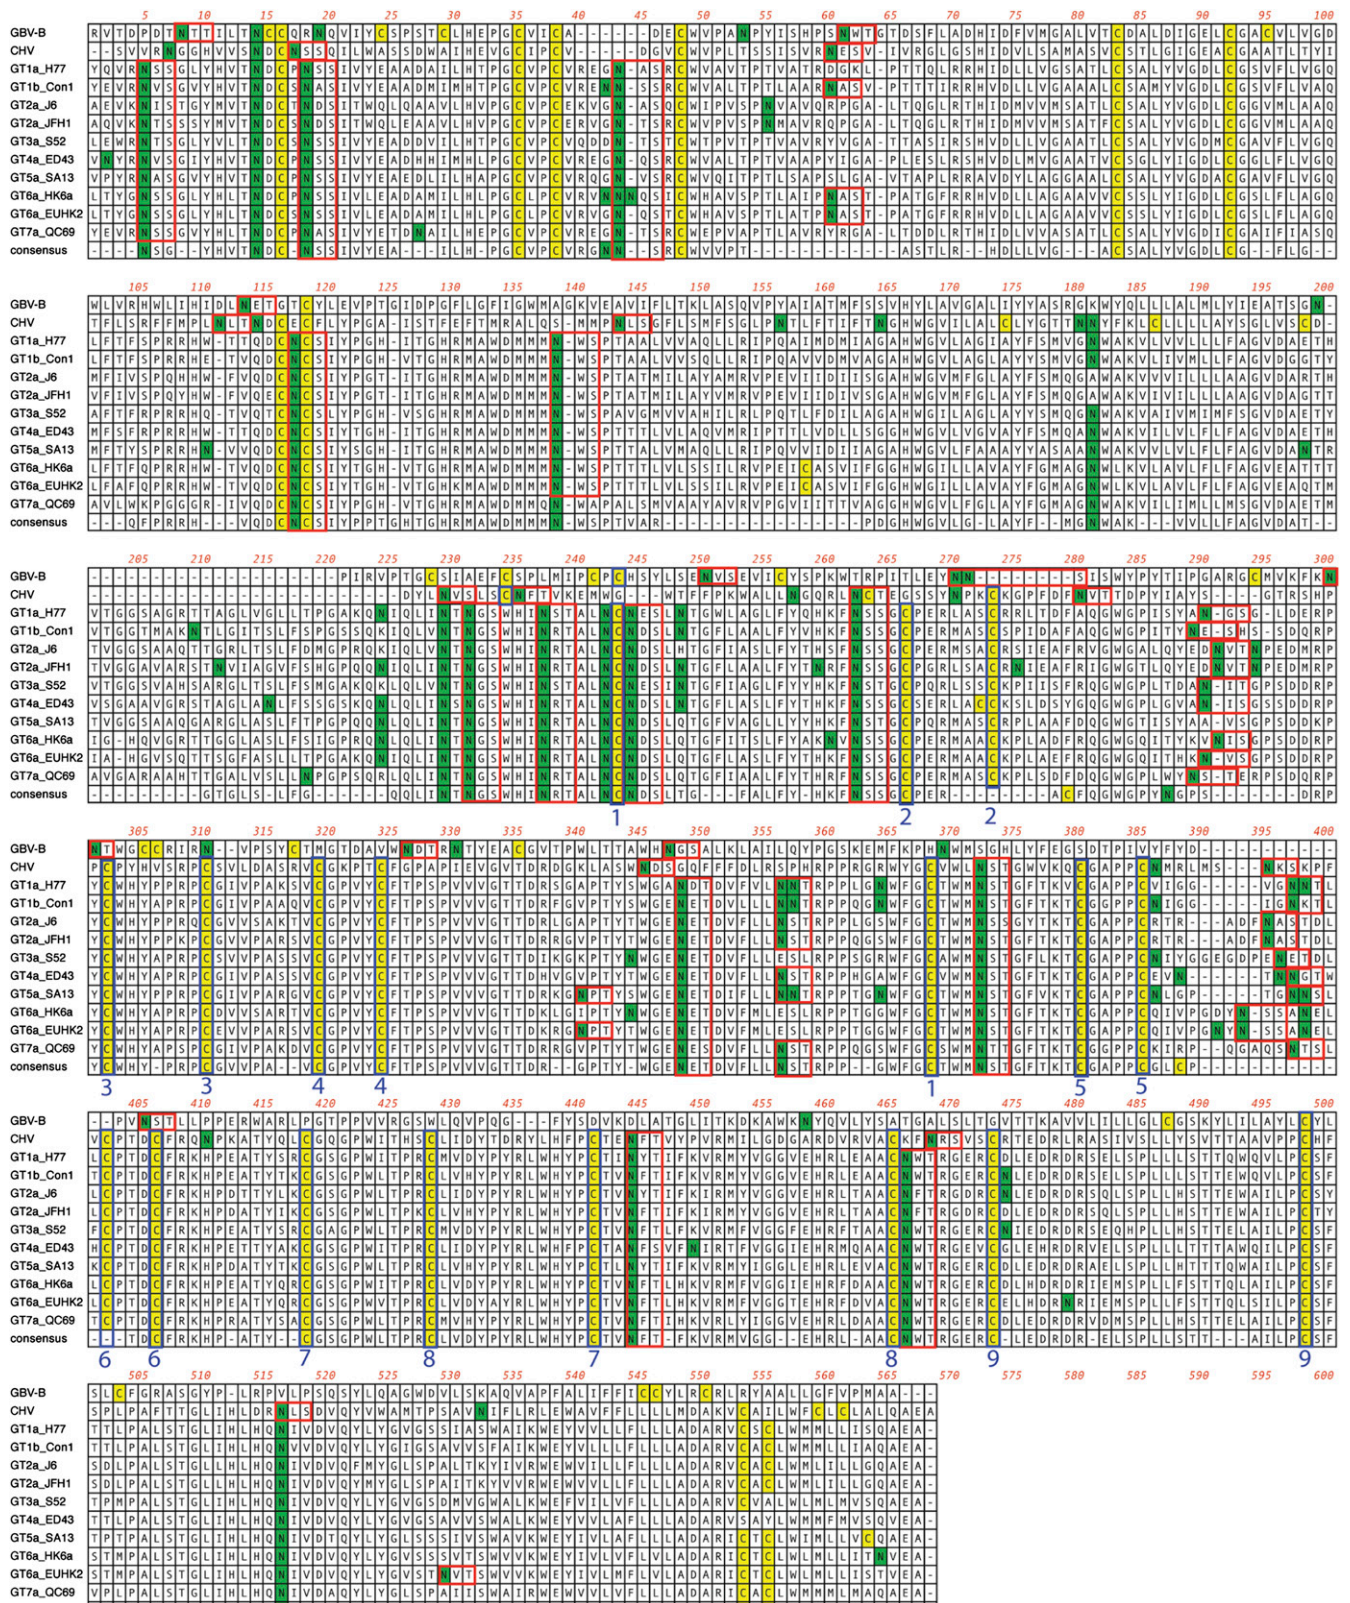

Fig. S1. Sequence alignment of envelope proteins E1 and E2 of CHV, GB virus B (GBV-B), and HCV genotypes 1a through 7a. Cysteine and asparagine residues are highlighted in yellow and green, respectively. Cysteines experimentally determined to form disulfide bridges in HCV E2 are shown in blue boxes, and blue numbers indicate disulfide connectivity (9). Predicted *N*-glycosylation sites in E1 and experimentally determined sites in E2 are shown in red boxes (10).





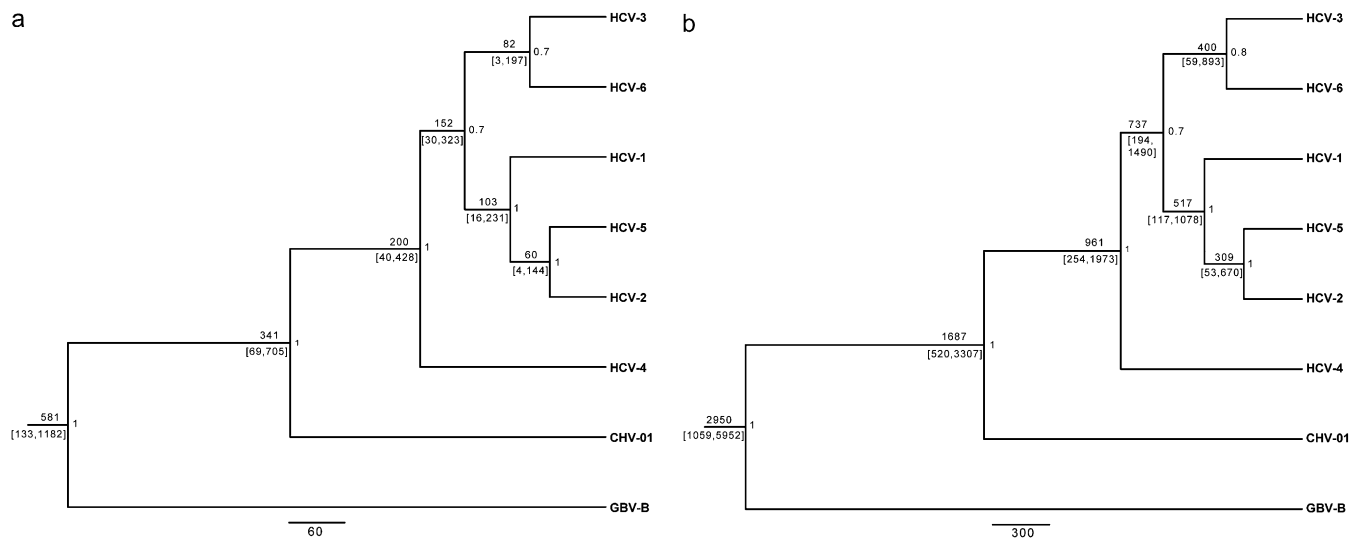

**Fig. S3.** Evolutionary analysis. Bayesian MCMC estimation of the TMRCA for the HCV strains, GBV-B, and CHV. Maximum clade credibility phylogeny of representative members of HCV (HCV 1: NC\_004102; HCV 2: NC\_009823; HCV 3: NC\_009824; HCV 4: NC\_009825; HCV 5: NC\_009826; and HCV 6: NC\_009827), hepatitis GBV-B (NC\_001655), and CHV-01. TMRCA were calculated by calibration with evolutionary rates estimated for NS5B based on HCV subtypes 1a and 1b (4) (A) and HCV subtype 6 (5) (B). The mean TMRCA with associated 95% highest probability densities for each node are shown to the left of the node, and the Bayesian posterior probabilities are given to the right. The scale bars are in units of years before present (ybp).

**Table S1.** Pairwise distances between 5' UTR, structural (S gene), and nonstructural (NS gene) proteins of different hepaciviruses

| Genome region | CHCV        | HCV         | GBV-B       | PgV         |
|---------------|-------------|-------------|-------------|-------------|
| 5' UTR        |             |             |             |             |
| CHV           | ND          |             |             |             |
| HCV           | 66.0        | 95.2        |             |             |
| GBV-B         | 56.7        | 62.8        | ND          |             |
| PgV           | IH          | IH          | IH          | 64.7        |
| S gene        |             |             |             |             |
| CHV           | ND          |             |             |             |
| HCV           | 44.1 (35.9) | 67.5 (71.6) |             |             |
| GBV-B         | 29.6 (11.2) | 29.6 (12.1) | ND          |             |
| PgV           | IH          | IH          | IH          | 44.8 (35.2) |
| NS gene       |             |             |             |             |
| CHV           | ND          |             |             |             |
| HCV           | 52.3 (50.7) | 66.2 (72.5) |             |             |
| GBV-B         | 41.1 (30.2) | 40.2 (30.6) | ND          |             |
| PgV           | 37.8 (25.5) | 38.4 (25.6) | 36.9 (24.3) | 52.4 (49.9) |

Amino acid divergence is given in parentheses. IH, Insufficient homology for valid comparison; ND, not done (only one sequence available); PgV, *Pegivirus* (GBV-A, -C, and -D).

**Table S2. Sequences, accession nos., and virus abbreviations used in the phylogenetic analysis described in Fig. 4**

| Genus/virus        | Accession no. | Description                                                                                              |
|--------------------|---------------|----------------------------------------------------------------------------------------------------------|
| <i>Flavivirus</i>  |               |                                                                                                          |
| APOIV              | AF160193      | Apoi virus polyprotein gene, complete cds   <i>Flavivirus</i>   Rio Bravo virus group                    |
| BANV               | DQ859056      | Banzi virus strain SAH 336 polyprotein gene, complete cds   <i>Flavivirus</i>   Yellow fever virus group |
| CHAOV              | FJ883471      | Chaoyang virus strain Deming polyprotein gene, complete cds   <i>Flavivirus</i>                          |
| DENV-4             | AF326573      | Dengue virus type 4 strain 814669, complete genome   <i>Flavivirus</i>   Dengue virus group              |
| EHV                | DQ859060      | Edge Hill virus strain YMP 48 polyprotein gene   <i>Flavivirus</i>   Yellow fever virus group            |
| GGYV               | DQ235145      | Gadgets Gully virus from Australia polyprotein gene, complete cds   <i>Flavivirus</i>                    |
| KADV               | DQ235146      | Kadam virus from Uganda polyprotein gene, complete cds   <i>Flavivirus</i>                               |
| KEDV               | DQ859061      | Kedougou virus strain Dak AR D1470 polyprotein gene, complete cds   <i>Flavivirus</i>                    |
| MMLV               | AJ299445      | Montana myotis leukoencephalitis virus complete genomic RNA   <i>Flavivirus</i>                          |
| MODV               | AJ242984      | Modoc virus genomic RNA for polyprotein gene   <i>Flavivirus</i>   Modoc virus group                     |
| NOUV               | EU159426      | Nounane virus polyprotein mRNA, complete cds   <i>Flavivirus</i>                                         |
| RBV                | AF144692      | Rio Bravo virus strain RiMAR polyprotein gene, complete cds   <i>Flavivirus</i>   Rio Bravo virus group  |
| SEPV               | DQ859063      | Sepik virus strain 7148 polyprotein gene, complete cds   <i>Flavivirus</i>   mosquito-borne viruses      |
| SPOV               | DQ859064      | Spondweni virus strain SM-6 V-1 polyprotein gene   <i>Flavivirus</i>   Spondweni virus group             |
| DENV-1             | DVU88536      | Dengue virus type 1 clone 45AZ5, complete genome   <i>Flavivirus</i>   Dengue virus group                |
| KFDV               | AY323490      | Kyasanur forest disease virus polyprotein gene   <i>Flavivirus</i>   tick-borne encephalitis virus group |
| YFV                | X03700        | Yellow fever virus complete genome, 17D vaccine strain   <i>Flavivirus</i>   Yellow fever virus group    |
| AEFV               | AB488408      | Aedes flavivirus genomic RNA, complete genome, strain Narita-21   <i>Flavivirus</i>                      |
| CFAV               | YFVCFAPP      | Flavivirus cell fusing agent polyprotein gene, complete cds   <i>Flavivirus</i>                          |
| CXFV               | GQ165808      | Culex flavivirus strain Uganda08 polyprotein gene, partial cds   <i>Flavivirus</i>                       |
| NAKV               | GQ165809      | Nakiwogo virus strain Uganda08 polyprotein gene, partial cds   Viruses   Flaviviridae                    |
| <i>Hepacivirus</i> |               |                                                                                                          |
| HCV-1a             | AF011751      | HCV strain H77 pCV-H77C polyprotein gene, complete cds                                                   |
| HCV-1b             | HPCJCG        | HCV ORF gene, complete cds   <i>Hepacivirus</i>                                                          |
| HCV-2b             | HPCJ8G        | D10988 D01221 HCV genome                                                                                 |
| HCV-2a             | HPCPOLP       | HCV genomic RNA for polyprotein, complete cds   <i>Hepacivirus</i>                                       |
| HCV-3a             | HPCEGS        | HCV (isolate NZL1) genomic RNA, complete genome   <i>Hepacivirus</i>                                     |
| HCV-3k             | HPCJK049E1    | HCV (isolate JK049) genomic RNA, complete genome   <i>Hepacivirus</i>                                    |
| HCV-4a             | HCV4APOLY     | Y11604 HCV type 4a RNA for HCV polyprotein                                                               |
| HCV-5a             | HCV1480       | Y13184 HCV genotype 5a RNA for HCV polyprotein                                                           |
| HCV-6a             | HCV12083      | Y12083 HCV genotype 6a RNA for HCV polyprotein                                                           |
| HCV-6g             | HPCJK046E2    | HCV (isolate JK046) genomic RNA, complete genome   <i>Hepacivirus</i>                                    |
| HCV-7a             | EF108306      | HCV (isolate QC69) polyprotein gene, complete cds   <i>Hepacivirus</i>                                   |
| GBV-B              | HGU22304      | U22304 hepatitis GBV-B polypeptide complete genome                                                       |
| <i>Pegivirus</i>   |               |                                                                                                          |
| SPgV               | AF023424      | Hepatitis GB virus A complete genome                                                                     |
| SPgV               | AF023425      | Hepatitis GB virus A complete genome                                                                     |
| SPgV               | HGU22303      | U22303 hepatitis GB virus A polyprotein, complete cds                                                    |
| SPgV               | HGU94421      | U94421 hepatitis GB virus A strain Alab, complete genome                                                 |
| HPgV               | AB003291      | Hepatitis GB virus C genomic RNA for polyprotein, isolate CG12LC                                         |
| HPgV               | AB003292      | Hepatitis GB virus C genomic RNA for polyprotein, isolate G05BD                                          |
| HPgV               | D87713        | Hepatitis GB virus C genomic RNA, complete sequence, strain K2141                                        |
| HPgV               | HGU637155     | U63715 Hepatitis GB virus C polyprotein gene, complete cds                                               |
| SPgVtro            | AF070476      | GB virus C variant troglodytes, complete genome,                                                         |
| BPgV               | GU566735      | GB virus D strain 93 polyprotein precursor, gene, partial cds                                            |
| <i>Pestivirus</i>  |               |                                                                                                          |
| BDV-1a             | AF037405      | Border disease virus strain X818, complete genome   <i>Pestivirus</i>                                    |
| BVDV-1a            | BVDCG         | Bovine viral diarrhea virus 1-NADL, complete genome   <i>Pestivirus</i>                                  |
| BVDV-2             | AF002227      | Border disease virus strain C413, complete genome   <i>Pestivirus</i>                                    |
| CSFV-1             | HCVCG3PE      | Classical swine fever virus, Brescia hog cholera virus protein precursor   <i>Pestivirus</i>             |
| Gir-PV             | AF144617      | Pestivirus giraffe-1 H138 complete genome   <i>Pestivirus</i>                                            |
| BDV-4              | GU270877      | Border disease virus strain H2121 (Chamois-1), complete genome   <i>Pestivirus</i>                       |
|                    | FJ040215      | Bovine viral diarrhea virus 3 Th/04 KhonKaen, complete genome   <i>Pestivirus</i>                        |
| Unassgd            | EF100713      | Porcine pestivirus isolate Bungowannah polyprotein gene, partial cds   <i>Pestivirus</i>                 |

cds, coding sequence; Unassgd, unassigned.
